## Correction: Propensity score matching analysis of the prognosis for the rare oxyphilic subtype of thyroid cancer (Hurthle cell carcinoma)

Yiquan Xiong<sup>1,\*</sup>, Qiuyang Zhao<sup>1,\*</sup>, Zhi Li<sup>1</sup>, Shuntao Wang<sup>1</sup>, Hui Guo<sup>1</sup>, Zeming Liu<sup>1</sup> and Tao Huang<sup>1</sup>

<sup>1</sup> Department of Breast and Thyroid Surgery, Union Hospital, Tongji Medical College, Huazhong University of Science and Technology, Wuhan 430022, China

\* These authors have contributed equally to this work

**Published:** March 23, 2018

**Copyright:** Xiong et al. This is an open-access article distributed under the terms of the Creative Commons Attribution License 3.0 (CC BY 3.0), which permits unrestricted use, distribution, and reproduction in any medium, provided the original author and source are credited.

**This article has been corrected:** The proper name of the institution is as follows:

<sup>1</sup> Department of Breast and Thyroid Surgery, Union Hospital, Tongji Medical College, Huazhong University of Science and Technology, Wuhan 430022, China

Original article: Oncotarget. 2017; 8:101362-101371. <https://doi.org/10.18632/oncotarget.20732>
